# Supplementary material for: Genus Litophyton: A Hidden Treasure Trove of Structurally Unique and Diversely Bioactive Secondary Metabolites
Source: MDPI journal article supplement (doi:10.3390/md21100523), 2023-09-29
Supplement: s1 [file s1]

# Supplementary Materials

**Table S1.** Secondary metabolites of the genus *Litophyton* from 1975 to July, 2023.

| No. | Name                                                 | Class                           | Species                    | Locality                         | Bioassays                                                                                                                                                                                                                                                                                                                                                                                                                                                                                                                                               | Ref. |
|-----|------------------------------------------------------|---------------------------------|----------------------------|----------------------------------|---------------------------------------------------------------------------------------------------------------------------------------------------------------------------------------------------------------------------------------------------------------------------------------------------------------------------------------------------------------------------------------------------------------------------------------------------------------------------------------------------------------------------------------------------------|------|
| 1   | (-)-bicyclogermacrene                                | bicyclogermacrene sesquiterpene | <i>Litophyton arboreum</i> | near Bali, Indonesia             | antiproliferative activities against the L-929 and K-562 cell lines (GI <sub>50</sub> 186±6 and 200±8 µM, respectively), cytotoxic effect against the HeLa cell line (CC <sub>50</sub> 182±8 µM)                                                                                                                                                                                                                                                                                                                                                        | [37] |
| 2   | (2E,6E)-3-isopropyl-6-methyl-10-oxoundeca-2,6-dienal | sec-germacrane sesquiterpene    | <i>L. arboreum</i>         | Neweba, Egypt (Red Sea)          | anti-malarial activity against chloroquine-sensitive <i>Plasmodium falciparum</i> D6 and chloroquine-resistant <i>Plasmodium falciparum</i> W2 (IC <sub>50</sub> 3.7 and 2.2 mg/mL, respectively), non-toxic to the Vero cell line at the concentration of 4.76 mg/mL                                                                                                                                                                                                                                                                                   | [19] |
| 3   | alismol                                              | guaiane sesquiterpene           | <i>L. arboreum</i>         | Sharm El-Sheikh, Egypt (Red Sea) | inhibitory activity against HIV-1 protease receptor (IC <sub>50</sub> 7.20±0.7 µM), cytotoxic activities against the HeLa and Vero cell lines (IC <sub>50</sub> 30 and 49 µM, respectively)                                                                                                                                                                                                                                                                                                                                                             | [38] |
|     |                                                      |                                 | <i>L. arboreum</i>         | Sharm El-Sheikh, Egypt (Red Sea) | cytotoxic effects against the HepG2, MDA and A549 cancer cell lines (IC <sub>50</sub> 4.52, 7.02 and 9.23 µg/mL, respectively)                                                                                                                                                                                                                                                                                                                                                                                                                          | [39] |
|     |                                                      |                                 | <i>L. arboreum</i>         | Jeddah, Saudi Arabia (Red Sea)   | antibacterial activities against <i>Escherichia coli</i> ATCC 10536, <i>Pseudomonas aeruginosa</i> NTCC 6750, <i>Bacillus cereus</i> ATCC 9634, <i>Bacillus subtilis</i> ATCC6633, <i>Staphylococcus aureus</i> ATCC5141 (MIC 9.2, 10.4, 4.3, 5.0, and 9.2 µg/mL, respectively), antifungal activities against <i>Candida albicans</i> and <i>Aspergillus niger</i> (MIC 10.1 and 7.2 µg/mL, respectively), cytotoxic effects against the MCF-7, HCT-116 and HepG2 cell lines (IC <sub>50</sub> 44.52±0.5, 31.45±1.19, and 10.71±1.18 µM, respectively) | [40] |
|     |                                                      |                                 | <i>L. arboreum</i>         | Neweba, Egypt (Red Sea)          | a —                                                                                                                                                                                                                                                                                                                                                                                                                                                                                                                                                     | [19] |
| 4   | 10-O-methyl alismoxide                               | guaiane sesquiterpene           | <i>L. arboreum</i>         | Sharm El-Sheikh, Egypt (Red Sea) | cytotoxic activities against the HeLa, Vero and U937 cell lines (IC <sub>50</sub> 38±0.7, 49.8±0.5 and 50±0.23 µM, respectively)                                                                                                                                                                                                                                                                                                                                                                                                                        | [38] |

| No. | Name                           | Class                    | Species            | Locality                            | Bioassays                                                                                                                                                                                                                                                                                                                                                                                                                                                                                    | Ref. |
|-----|--------------------------------|--------------------------|--------------------|-------------------------------------|----------------------------------------------------------------------------------------------------------------------------------------------------------------------------------------------------------------------------------------------------------------------------------------------------------------------------------------------------------------------------------------------------------------------------------------------------------------------------------------------|------|
|     |                                |                          | <i>Nephtea</i> sp. | Hurghada, Egypt<br>(Red Sea)        | cytotoxicity against the MCF-7 cell line (IC <sub>50</sub> 85.5 µg/mL)                                                                                                                                                                                                                                                                                                                                                                                                                       | [42] |
| 5   | alismoxide                     | guaiane<br>sesquiterpene | <i>L. arboreum</i> | Sharm El-Sheikh, Egypt<br>(Red Sea) | inactive against the HeLa, Vero and U937 cell lines (all<br>IC <sub>50</sub> >100 µM)                                                                                                                                                                                                                                                                                                                                                                                                        | [38] |
|     |                                |                          | <i>L. arboreum</i> | Hurghada, Egypt<br>(Red Sea)        | inactive against the A549, MCF-7 and HepG2 cell lines (all<br>IC <sub>50</sub> >100 µmol/mL)                                                                                                                                                                                                                                                                                                                                                                                                 | [41] |
|     |                                |                          | <i>L. arboreum</i> | Neweba, Egypt<br>(Red Sea)          | a –                                                                                                                                                                                                                                                                                                                                                                                                                                                                                          | [19] |
|     |                                |                          | <i>Nephtea</i> sp. | Hurghada, Egypt<br>(Red Sea)        | cytotoxicity against the MCF-7 cell line (IC <sub>50</sub> 151.9 µg/mL)                                                                                                                                                                                                                                                                                                                                                                                                                      | [42] |
| 6   | alismorientol B                | guaiane<br>sesquiterpene | <i>L. arboreum</i> | Jeddah, Saudi Arabia<br>(Red Sea)   | antibacterial activities against <i>E. coli</i> ATCC 10536, <i>P. aeruginosa</i> NTCC 6750, <i>B. cereus</i> ATCC 9634, <i>B. subtilis</i> ATCC6633, <i>S. aureus</i> ATCC5141 (MIC 3.4, 7.7, 1.3, 6.8, and 8.3 µg/mL, respectively), antifungal activities against <i>C. albicans</i> and <i>A. niger</i> (MIC 6.0 and 8.4 µg/mL, respectively), cytotoxic effects against the MCF-7, HCT-116 and HepG2 cell lines (IC <sub>50</sub> 4.32±0.13, 27.86±1.28 and 12.27±1.09 µM, respectively) | [40] |
| 7   | litoarbolide A                 | guaiane<br>sesquiterpene | <i>L. arboreum</i> | Neweba, Egypt<br>(Red Sea)          | no anti-malarial activity against chloroquine-sensitive <i>P. falciparum</i> D6 and chloroquine-resistant <i>P. falciparum</i> W2 at the concentration of 4.76 mg/mL, non-toxic to the Vero cell line at the concentration of 4.76 mg/mL                                                                                                                                                                                                                                                     | [19] |
| 8   | 4α,7β,10α-trihydroxyguai-5-ene | guaiane<br>sesquiterpene | <i>L. arboreum</i> | Neweba, Egypt<br>(Red Sea)          | no anti-malarial activity against chloroquine-sensitive <i>P. falciparum</i> D6 and chloroquine-resistant <i>P. falciparum</i> W2 at the concentration of 4.76 mg/mL, non-toxic to the Vero cell line at the concentration of 4.76 mg/mL                                                                                                                                                                                                                                                     | [19] |
| 9   | leptocladol B                  | guaiane<br>sesquiterpene | <i>L. arboreum</i> | Neweba, Egypt<br>(Red Sea)          | anti-malarial activity against chloroquine-resistant <i>P. falciparum</i> W2 (IC <sub>50</sub> 4.3 mg/mL), no anti-malarial effect against chloroquine-sensitive <i>P. falciparum</i> D6 at the concentration of 4.76 mg/mL, non-toxic to the Vero cell line                                                                                                                                                                                                                                 | [19] |

| No. | Name                                  | Class                           | Species            | Locality                       | Bioassays                                                                                                                                                                                                                                                                                                                                                                                                                                                                                       | Ref. |
|-----|---------------------------------------|---------------------------------|--------------------|--------------------------------|-------------------------------------------------------------------------------------------------------------------------------------------------------------------------------------------------------------------------------------------------------------------------------------------------------------------------------------------------------------------------------------------------------------------------------------------------------------------------------------------------|------|
|     |                                       |                                 |                    |                                | at the concentration of 4.76 mg/mL                                                                                                                                                                                                                                                                                                                                                                                                                                                              |      |
| 10  | nephthetetraol                        | guaiane sesquiterpene           | <i>L. arboreum</i> | Neweba, Egypt (Red Sea)        | anti-malarial activity against chloroquine-resistant <i>P. falciparum</i> W2 (IC <sub>50</sub> 3.2 mg/mL), no anti-malarial effect against chloroquine-sensitive <i>P. falciparum</i> D6 at the concentration of 4.76 mg/mL, non-toxic to the Vero cell line at the concentration of 4.76 mg/mL                                                                                                                                                                                                 | [19] |
| 11  | litopharbol                           | pseudoguaiane sesquiterpene     | <i>L. arboreum</i> | Jeddah, Saudi Arabia (Red Sea) | antibacterial activities against <i>E. coli</i> ATCC 10536, <i>P. aeruginosa</i> NTCC 6750, <i>B. cereus</i> ATCC 9634, <i>B. subtilis</i> ATCC6633, <i>S. aureus</i> ATCC5141 (MIC 9.0, 3.6, 1.8, 5.8, and 9.6 µg/mL, respectively), antifungal activities against <i>C. albicans</i> and <i>A. niger</i> (MIC 12.5 and 12.9 µg/mL, respectively), cytotoxic effects against the MCF-7, HCT-116 and HepG2 cell lines (IC <sub>50</sub> 9.42±0.17, 26.21±2.249 and 38.92±1.12 µM, respectively) | [40] |
| 12  | litopharbdiol                         | pseudoguaiane sesquiterpene     | <i>L. arboreum</i> | Jeddah, Saudi Arabia (Red Sea) | <sup>a</sup> –                                                                                                                                                                                                                                                                                                                                                                                                                                                                                  | [20] |
| 13  | 3α,6α-epidioxyhimachal-1-ene          | himachalene sesquiterpene       | <i>L. arboreum</i> | Jeddah, Saudi Arabia (Red Sea) | <sup>b</sup> antiproliferative effects toward MCF-7, HCT116 and HepG2 cell lines                                                                                                                                                                                                                                                                                                                                                                                                                | [43] |
| 14  | 5β,8β-epidioxy-11-hydroxy-6-eudesmene | eudesmane sesquiterpene         | <i>L. arboreum</i> | Hurghada, Egypt (Red Sea)      | cytotoxic effect against A549 (IC <sub>50</sub> 67.3±9.9 µmol/mL), inactive against the MCF-7 and HepG2 cell lines (both IC <sub>50</sub> >100 µmol/mL)                                                                                                                                                                                                                                                                                                                                         | [41] |
| 15  | chabrolidione B                       | seco-eudesmane sesquiterpene    | <i>L. arboreum</i> | Hurghada, Egypt (Red Sea)      | inactive against the A549, MCF-7 and HepG2 cell lines (all IC <sub>50</sub> >100 µmol/mL)                                                                                                                                                                                                                                                                                                                                                                                                       | [41] |
| 16  | teuhetenone A                         | tri-nor-eudesmane sesquiterpene | <i>L. arboreum</i> | Jeddah, Saudi Arabia (Red Sea) | antibacterial activities against <i>E. coli</i> ATCC 10536, <i>P. aeruginosa</i> NTCC 6750, <i>B. cereus</i> ATCC 9634, <i>B. subtilis</i> ATCC6633, <i>S. aureus</i> ATCC5141 (MIC 1.9, 2.8, 5.4, 4.3, and 10.9 µg/mL, respectively), antifungal activities against <i>C. albicans</i> and <i>A. niger</i> (MIC 4.1 and 7.4 µg/mL, respectively), cytotoxic effect against the HepG2 cell line (IC <sub>50</sub> 39.23±3.21 µM), non-toxic to the MCF-7 and HCT-116 cell lines (both           | [40] |

| No. | Name                                 | Class                           | Species                  | Locality                                       | Bioassays                                                                                                                                                                                                                                                                                                                                                                                                                                                                                                                              | Ref. |
|-----|--------------------------------------|---------------------------------|--------------------------|------------------------------------------------|----------------------------------------------------------------------------------------------------------------------------------------------------------------------------------------------------------------------------------------------------------------------------------------------------------------------------------------------------------------------------------------------------------------------------------------------------------------------------------------------------------------------------------------|------|
|     |                                      |                                 |                          |                                                | IC <sub>50</sub> >100 µM)                                                                                                                                                                                                                                                                                                                                                                                                                                                                                                              |      |
| 17  | calamusin I                          | tri-nor-eudesmane sesquiterpene | <i>L. arboreum</i>       | Jeddah, Saudi Arabia (Red Sea)                 | antibacterial activities against <i>E. coli</i> ATCC 10536, <i>P. aeruginosa</i> NTCC 6750, <i>B. cereus</i> ATCC 9634, <i>B. subtilis</i> ATCC6633, <i>S. aureus</i> ATCC5141 (MIC 3.2, 1.2, 6.1, 7.8, and 7.4 µg/mL, respectively), antifungal activities against <i>C. albicans</i> and <i>A. niger</i> (MIC 3.2 and 5.6 µg/mL, respectively), cytotoxic effects against the MCF-7 and HepG2 cell lines (IC <sub>50</sub> 6.43±0.23 and 13.46±1.16 µM, respectively), non-toxic to the HCT-116 cell line (IC <sub>50</sub> >100 µM) | [40] |
| 18  | 7-oxo-tri-nor-eudesm-5-en-4β-ol      | tri-nor-eudesmane sesquiterpene | <i>L. arboreum</i>       | Hurghada, Egypt (Red Sea)                      | inactive against the A549, MCF-7 and HepG2 cell lines (all IC <sub>50</sub> >100 µmol/mL)                                                                                                                                                                                                                                                                                                                                                                                                                                              | [41] |
| 19  | 11,12-dihydroxy-6,10-eremophiladiene | eremophilane sesquiterpene      | <i>Litophyton nigrum</i> | Xisha Islands, Hainan, China (South China Sea) | a –                                                                                                                                                                                                                                                                                                                                                                                                                                                                                                                                    | [36] |
| 20  | linardosinene B                      | nardosinane sesquiterpenes      | <i>L. nigrum</i>         | Xisha Islands, Hainan, China (South China Sea) | cytotoxic effect against the THP-1 cell line (IC <sub>50</sub> 59.49 µM)                                                                                                                                                                                                                                                                                                                                                                                                                                                               | [15] |
| 21  | linardosinene C                      | nardosinane sesquiterpenes      | <i>L. nigrum</i>         | Xisha Islands, Hainan, China (South China Sea) | cytotoxic activities against the SNU-398 and HT-29 cell lines (IC <sub>50</sub> 24.3 and 44.7 µM, respectively), inactive against the Capan-1 and A549 cell lines (both IC <sub>50</sub> >50 µM)                                                                                                                                                                                                                                                                                                                                       | [15] |
| 22  | linardosinene D                      | nardosinane sesquiterpenes      | <i>L. nigrum</i>         | Xisha Islands, Hainan, China (South China Sea) | inhibitory effect against BRD4 at a concentration of 10 µM with inhibitory rate 16.3%                                                                                                                                                                                                                                                                                                                                                                                                                                                  | [44] |
| 23  | linardosinene E                      | nardosinane sesquiterpenes      | <i>L. nigrum</i>         | Xisha Islands, Hainan, China (South China Sea) | inhibitory effect against BRD4 at a concentration of 10 µM with inhibitory rate 15.8%                                                                                                                                                                                                                                                                                                                                                                                                                                                  | [44] |
| 24  | linardosinene F                      | nardosinane sesquiterpenes      | <i>L. nigrum</i>         | Xisha Islands, Hainan, China (South China Sea) | inhibitory effect against BRD4 at a concentration of 10 µM with inhibitory rate 17.6%                                                                                                                                                                                                                                                                                                                                                                                                                                                  | [44] |
| 25  | linardosinene G                      | nardosinane                     | <i>L. nigrum</i>         | Xisha Islands, Hainan,                         | inhibitory effect against BRD4 at a concentration of 10 µM                                                                                                                                                                                                                                                                                                                                                                                                                                                                             | [44] |

| No. | Name                                                                                                             | Class                            | Species                         | Locality                                             | Bioassays                                                                                                                                                                                                                                                                 | Ref. |
|-----|------------------------------------------------------------------------------------------------------------------|----------------------------------|---------------------------------|------------------------------------------------------|---------------------------------------------------------------------------------------------------------------------------------------------------------------------------------------------------------------------------------------------------------------------------|------|
|     |                                                                                                                  | sesquiterpenes                   |                                 | China<br>(South China Sea)                           | with inhibitory rate 18.1%                                                                                                                                                                                                                                                |      |
| 26  | linardosinene I                                                                                                  | nardosinane<br>sesquiterpenes    | <i>L. nigrum</i>                | Xisha Islands, Hainan,<br>China<br>(South China Sea) | inhibitory activity against PTP1B ( $IC_{50}$ $10.67 \pm 1.81$ $\mu\text{g/mL}$ ),<br>cytotoxic activities against the HT-29, Capan-1 and<br>SNU-398 cell lines ( $IC_{50}$ $35.48 \pm 11.22$ , $42.55 \pm 2.51$ , and<br>$25.17 \pm 11.13$ $\mu\text{M}$ , respectively) | [36] |
| 27  | emnal-l(10)-ene-7 $\beta$ ,12 $\alpha$ -diol                                                                     | nardosinane<br>sesquiterpenes    | <i>L. nigrum</i>                | Xisha Islands, Hainan,<br>China<br>(South China Sea) | inactive against PTP1B ( $IC_{50}$ $>20$ $\mu\text{g/mL}$ ) and the HT-29,<br>Capan-1 and SNU-398 cell lines (all $IC_{50}$ $>50$ $\mu\text{M}$ )                                                                                                                         | [36] |
| 28  | paralemnolin J                                                                                                   | nardosinane<br>sesquiterpenes    | <i>Litophyton<br/>setoensis</i> | Singaraja, Bali Island,<br>Indonesia                 | weak cytotoxic activities against the HT-29, Capan-1, A549,<br>and SNU-398 cell lines (all $IC_{50}$ $>20$ $\mu\text{M}$ )                                                                                                                                                | [17] |
| 29  | (1S,8S,8aS)-l-[(E)-2'-acetoxy-l'-meth<br>ylethenyl]-8,8a-dimethyl-3,4,6,7,8,8<br>a-hexahydronaphthalen-2(1H)-one | nardosinane<br>sesquiterpenes    | <i>L. setoensis</i>             | Singaraja, Bali Island,<br>Indonesia                 | weak cytotoxic activities against the HT-29, Capan-1, A549,<br>and SNU-398 cell lines (all $IC_{50}$ $>20$ $\mu\text{M}$ )                                                                                                                                                | [17] |
| 30  | linardosinene A                                                                                                  | nornardosinane<br>sesquiterpenes | <i>L. nigrum</i>                | Xisha Islands, Hainan,<br>China<br>(South China Sea) | inactive against the THP-1 cell line and the PTP1B, BRD4,<br>HDAC1 and HDAC6 protein kinases                                                                                                                                                                              | [15] |
| 31  | lineolemnene A                                                                                                   | neolemnane<br>sesquiterpene      | <i>L. nigrum</i>                | Xisha Islands, Hainan,<br>China<br>(South China Sea) | cytotoxic activity against the SNU-398 cell line ( $IC_{50}$ $44.4$<br>$\mu\text{M}$ ), inactive against the HT-29, Capan-1 and A549 cell<br>lines (all $IC_{50}$ $>50$ $\mu\text{M}$ )                                                                                   | [15] |
| 32  | lineolemnene B                                                                                                   | neolemnane<br>sesquiterpene      | <i>L. nigrum</i>                | Xisha Islands, Hainan,<br>China<br>(South China Sea) | cytotoxic activity against the SNU-398 cell line ( $IC_{50}$ $27.6$<br>$\mu\text{M}$ ), inactive against the HT-29, Capan-1 and A549 cell<br>lines (all $IC_{50}$ $>50$ $\mu\text{M}$ )                                                                                   | [15] |
| 33  | lineolemnene C                                                                                                   | neolemnane<br>sesquiterpene      | <i>L. nigrum</i>                | Xisha Islands, Hainan,<br>China<br>(South China Sea) | inactive against the HT-29, Capan-1, A549, and SNU-398<br>cell lines (all $IC_{50}$ $>50$ $\mu\text{M}$ )                                                                                                                                                                 | [15] |
| 34  | 4-acetoxy-2,8-neolemnadien-5-one                                                                                 | neolemnane<br>sesquiterpene      | <i>L. nigrum</i>                | Xisha Islands, Hainan,<br>China<br>(South China Sea) | a —                                                                                                                                                                                                                                                                       | [15] |
|     |                                                                                                                  |                                  | <i>L. setoensis</i>             | Singaraja, Bali Island,                              | weak cytotoxic activities against the HT-29, Capan-1, A549,                                                                                                                                                                                                               | [17] |

| No. | Name               | Class                                               | Species                   | Locality                                       | Bioassays                                                                                                                                                                                              | Ref. |
|-----|--------------------|-----------------------------------------------------|---------------------------|------------------------------------------------|--------------------------------------------------------------------------------------------------------------------------------------------------------------------------------------------------------|------|
|     |                    |                                                     |                           | Indonesia                                      | and SNU-398 cell lines (all IC <sub>50</sub> >20 µM)                                                                                                                                                   |      |
| 35  | paralemnolin E     | neolemnane sesquiterpene                            | <i>L. setoensis</i>       | Singaraja, Bali Island, Indonesia              | weak cytotoxic activities against the HT-29, Capan-1, A549, and SNU-398 cell lines (all IC <sub>50</sub> >20 µM)                                                                                       | [17] |
| 36  | parathyrsoidin E   | neolemnane sesquiterpene                            | <i>Nephthea</i> sp.       | Sharm El-Sheikh, Egypt (Red Sea)               | potential SARS-CoV-2 main protease inhibitor <i>in silica</i>                                                                                                                                          | [45] |
| 37  | lineolemnene D     | seconeolemnane sesquiterpene                        | <i>L. nigrum</i>          | Xisha Islands, Hainan, China (South China Sea) | inactive against the THP-1 cell line and the PTP1B, BRD4, HDAC1 and HDAC6 protein kinases                                                                                                              | [15] |
| 38  | kelsoenethiol      | kelsoane sesquiterpene                              | <i>Nephthea erecta</i>    | Green Island, Taiwan                           | cytotoxic activities against the P-388 and HT-29 cell lines (ED <sub>50</sub> 1.3 and 1.8 µg/mL, respectively)                                                                                         | [22] |
| 39  | dikelsoenyl ether  | <i>bis</i> -kelsoane <i>bis</i> -sesquiterpene      | <i>N. erecta</i>          | Green Island, Taiwan                           | inactive against the A-459, P-388 and HT-29 cell lines                                                                                                                                                 | [22] |
| 40  | linardosinene H    | eremophilane-nar dosinane <i>bis</i> -sesquiterpene | <i>L. nigrum</i>          | Xisha Islands, Hainan, China (South China Sea) | inactive against PTP1B (IC <sub>50</sub> >20 µg/mL) and the HT-29, Capan-1 and SNU-398 cell lines (all IC <sub>50</sub> >50 µM)                                                                        | [36] |
| 41  | nephtenol          | cembrane diterpene                                  | <i>Litophyton viridis</i> | Serwaru, Leti Island, Indonesia                | <sup>a</sup> –                                                                                                                                                                                         | [21] |
|     |                    |                                                     | <i>L. arboreum</i>        | Hurghada, Egypt (Red Sea)                      | <sup>a</sup> –                                                                                                                                                                                         | [47] |
|     |                    |                                                     | <i>L. arboreum</i>        | Jeddah, Saudi Arabia (Red Sea)                 | <sup>a</sup> –                                                                                                                                                                                         | [20] |
|     |                    |                                                     | <i>Nephthea</i> sp.       | Mantanani Island, Sabah, Malaysia              | no repellent activity against the maize weevil <i>Sitophilus zeamais</i> at 250 µg/cm <sup>2</sup>                                                                                                     | [46] |
| 42  | 2-hydroxynephtenol | cembrane diterpene                                  | <i>L. viridis</i>         | Serwaru, Leti Island, Indonesia                | <sup>a</sup> –                                                                                                                                                                                         | [21] |
|     |                    |                                                     | <i>Nephthea</i> sp.       | Mantanani Island, Sabah, Malaysia              | no repellent activity against the maize weevil <i>S. zeamais</i> at 250 µg/cm <sup>2</sup>                                                                                                             | [46] |
|     |                    |                                                     | <i>Nephthea</i> sp.       | Sepanggar Bay, Sabah, North Borneo, Malaysia   | antifungal activities against <i>Exophiala</i> sp. NJM 1551, <i>Fusarium moniliforme</i> NJM 8995, <i>Fusarium oxysporum</i> NJM 0179, <i>Fusarium solani</i> NJM 8996, <i>Haliphthoros sabahensis</i> | [25] |

| No. | Name                                                                               | Class              | Species                    | Locality                         | Bioassays                                                                                                                                                                                                                                                                                                                       | Ref. |
|-----|------------------------------------------------------------------------------------|--------------------|----------------------------|----------------------------------|---------------------------------------------------------------------------------------------------------------------------------------------------------------------------------------------------------------------------------------------------------------------------------------------------------------------------------|------|
|     |                                                                                    |                    |                            |                                  | IPMB 1402, <i>Haliphthoros milfordensis</i> IPMB 1603, and <i>Lagenidium thermophilum</i> IPMB 1401 (MIC 25, 50, 50, 50, 25, 25, and 12.5 µg/mL, respectively)                                                                                                                                                                  |      |
| 43  | (3 <i>E</i> ,11 <i>E</i> )-cembra-3,8(19),11,15-tetraene-7α-ol                     | cembrane diterpene | <i>L. arboreum</i>         | Hurghada, Egypt (Red Sea)        | a –                                                                                                                                                                                                                                                                                                                             | [47] |
| 44  | sarcophytol M                                                                      | cembrane diterpene | <i>L. arboreum</i>         | Sharm El-Sheikh, Egypt (Red Sea) | inhibitory activity against HIV-1 protease receptor (IC <sub>50</sub> 15.7±0.10 µM), cytotoxic activities against the HeLa, Vero and U937 cell lines (IC <sub>50</sub> 27.5±0.2, 22±0.2 and 31.7±3.2 µM, respectively)                                                                                                          | [38] |
| 45  | 11-acetoxy-15,17-dihydroxy-2,12-epoxy-(3 <i>E</i> ,7 <i>E</i> )-1-cembra-3,7-diene | cembrane diterpene | <i>L. arboreum</i>         | Jeddah, Saudi Arabia (Red Sea)   | antiproliferative effects toward the MCF-7, HCT116 and HepG2 cell lines (IC <sub>50</sub> 19.1±0.032, 22.0±0.092, 24.0±0.032 µM, respectively)                                                                                                                                                                                  | [43] |
| 46  | 11β,12β-epoxypukalide                                                              | cembrane diterpene | <i>L. arboreum</i>         | near Bali, Indonesia             | antiproliferative activities against the L-929 and K-5629 cell lines (both GI <sub>50</sub> >129 µM, respectively), cytotoxic effect against the HeLa cell line (CC <sub>50</sub> 115±6 µM)                                                                                                                                     | [37] |
| 47  | columnariol A                                                                      | cembrane diterpene | <i>Nephthea columnaris</i> | Southern Taiwan                  | significantly inhibit the accumulation of the pro-inflammatory iNOS and COX-2 protein of the lipopolysaccharide (LPS)-stimulated RAW264.7 macrophage cells; moderate cytotoxicity against the LNCaP cell line (IC <sub>50</sub> 9.80 µg/mL), inactive against the MOLT-4, SUP-T1, U-937, DLD-1, and MCF7 cell lines at 20 µg/mL | [23] |
| 48  | columnariol B                                                                      | cembrane diterpene | <i>N. columnaris</i>       | Southern Taiwan                  | significantly inhibit the accumulation of the pro-inflammatory iNOS and COX-2 protein of the lipopolysaccharide (LPS)-stimulated RAW264.7 macrophage cells; inactive against the MOLT-4, SUP-T1, U-937, DLD-1, LNCaP, and MCF7 cell lines at 20 µg/mL                                                                           | [23] |
| 49  | 2β-hydroxy-7β,8α-epoxynephthenol                                                   | cembrane diterpene | <i>N. columnaris</i>       | Southern Taiwan                  | inactive against the MOLT-4, SUP-T1, U-937, DLD-1, LNCaP, and MCF7 cell lines at 20 µg/mL                                                                                                                                                                                                                                       | [48] |
| 50  | 2β-hydroxy-11α,12β-epoxynephthe                                                    | cembrane           | <i>N. columnaris</i>       | Southern Taiwan                  | inactive against the MOLT-4, SUP-T1, U-937, DLD-1,                                                                                                                                                                                                                                                                              | [48] |

| No. | Name                                              | Class              | Species              | Locality                                     | Bioassays                                                                                                                                                                                                                                                                                                                                          | Ref. |
|-----|---------------------------------------------------|--------------------|----------------------|----------------------------------------------|----------------------------------------------------------------------------------------------------------------------------------------------------------------------------------------------------------------------------------------------------------------------------------------------------------------------------------------------------|------|
|     | nol                                               | diterpene          |                      |                                              | LNCaP, and MCF7 cell lines at 20 µg/mL                                                                                                                                                                                                                                                                                                             |      |
| 51  | epoxynephthenol                                   | cembrane diterpene | <i>N. columnaris</i> | Southern Taiwan                              | inactive against the MOLT-4, SUP-T1, U-937, DLD-1, LNCaP, and MCF7 cell lines at 20 µg/mL                                                                                                                                                                                                                                                          | [48] |
| 52  | 10-hydroxy-nephthenol acetate                     | cembrane diterpene | <i>Nephthea</i> sp.  | Layangan, Sabah, Malaysia                    | antibacterial activity against <i>S. aureus</i> and <i>E. coli</i> with a MBC/MIC ratio of 2.4 and 3.0, respectively; cytotoxic activities against the HeLa and MCF-7 cell lines (IC <sub>50</sub> 40.0 and 25.0 µg/mL, respectively)                                                                                                              | [24] |
| 53  | 7,8-epoxy-10-hydroxy-nephthenol acetate           | cembrane diterpene | <i>Nephthea</i> sp.  | Layangan, Sabah, Malaysia                    | antibacterial activity against <i>S. aureus</i> and <i>E. coli</i> with a MBC/MIC ratio of 6.0 and 6.0, respectively; cytotoxic activities against the HeLa and MCF-7 cell lines (IC <sub>50</sub> 125.0 and 75.0 µg/mL, respectively)                                                                                                             | [24] |
| 54  | 6-acetoxy-7,8-epoxy-10-hydroxy-nephthenol acetate | cembrane diterpene | <i>Nephthea</i> sp.  | Layangan, Sabah, Malaysia                    | inactive against the bacterial strains <i>S. aureus</i> ATCC 6538, <i>Listeria monocytogenes</i> ATCC 19113, <i>E. coli</i> ATCC 35210, and <i>Salmonella typhimurium</i> ATCC 13311, and the HeLa, MCF-7 and HT-29 cell lines                                                                                                                     | [24] |
| 55  | 6-acetoxy-7,8-epoxy-nephthenol acetate            | cembrane diterpene | <i>Nephthea</i> sp.  | Layangan, Sabah, Malaysia                    | inactive against the bacterial strains <i>S. aureus</i> ATCC 6538, <i>L. monocytogenes</i> ATCC 19113, <i>E. coli</i> ATCC 35210, and <i>S. typhimurium</i> ATCC 13311, and the HeLa, MCF-7 and HT-29 cell lines                                                                                                                                   | [24] |
|     |                                                   |                    | <i>Nephthea</i> sp.  | Sepanggar Bay, Sabah, North Borneo, Malaysia | antifungal activities against <i>Exophiala</i> sp. NJM 1551, <i>H. sabahensis</i> IPMB 1402, <i>H. milfordensis</i> IPMB 1603, and <i>L. thermophilum</i> IPMB 1401 (MIC 50, 25, 50, and 25 µg/mL, respectively), inactive against <i>F. moniliforme</i> NJM 8995, <i>F. oxysporum</i> NJM 0179 and <i>F. solani</i> NJM 8996 (all MIC >100 µg/mL) | [25] |
| 56  | nephthecrassocolide A                             | cembrane diterpene | <i>Nephthea</i> sp.  | Sepanggar Bay, Sabah, North Borneo, Malaysia | antifungal activities against <i>Exophiala</i> sp. NJM 1551, <i>F. oxysporum</i> NJM 0179, <i>F. solani</i> NJM 8996, <i>H. sabahensis</i> IPMB 1402, <i>H. milfordensis</i> IPMB 1603, and <i>L. thermophilum</i> IPMB 1401 (MIC 25, 50, 50, 25, 25, and 25 µg/mL, respectively), inactive against <i>F. moniliforme</i> NJM 8995                 | [25] |



| No. | Name                         | Class                 | Species               | Locality                                     | Bioassays                                                                                                                                                                                                                                                                                                                                          | Ref. |
|-----|------------------------------|-----------------------|-----------------------|----------------------------------------------|----------------------------------------------------------------------------------------------------------------------------------------------------------------------------------------------------------------------------------------------------------------------------------------------------------------------------------------------------|------|
|     |                              |                       |                       |                                              | (MIC >100 µg/mL)                                                                                                                                                                                                                                                                                                                                   |      |
| 57  | nephthecrassocolide B        | cembrane diterpene    | <i>Nephthea</i> sp.   | Sepanggar Bay, Sabah, North Borneo, Malaysia | antifungal activities against <i>Exophiala</i> sp. NJM 1551, <i>H. sabahensis</i> IPMB 1402, <i>H. milfordensis</i> IPMB 1603, and <i>L. thermophilum</i> IPMB 1401 (MIC 50, 50, 50, and 25 µg/mL, respectively), inactive against <i>F. moniliforme</i> NJM 8995, <i>F. oxysporum</i> NJM 0179 and <i>F. solani</i> NJM 8996 (all MIC >100 µg/mL) | [25] |
| 58  | 6-acetoxy nephthenol acetate | cembrane diterpene    | <i>Nephthea</i> sp.   | Sepanggar Bay, Sabah, North Borneo, Malaysia | antifungal activities against <i>Exophiala</i> sp. NJM 1551, <i>H. sabahensis</i> IPMB 1402, <i>H. milfordensis</i> IPMB 1603, and <i>L. thermophilum</i> IPMB 1401 (MIC 50, 25, 25, and 25 µg/mL, respectively), inactive against <i>F. moniliforme</i> NJM 8995, <i>F. oxysporum</i> NJM 0179 and <i>F. solani</i> NJM 8996 (all MIC >100 µg/mL) | [25] |
| 59  | epoxy nephthenol acetate     | cembrane diterpene    | <i>Nephthea</i> sp.   | Sepanggar Bay, Sabah, North Borneo, Malaysia | antifungal activities against <i>Exophiala</i> sp. NJM 1551, <i>F. moniliforme</i> NJM 8995, <i>F. oxysporum</i> NJM 0179, <i>F. solani</i> NJM 8996, <i>H. sabahensis</i> IPMB 1402, <i>H. milfordensis</i> IPMB 1603, and <i>L. thermophilum</i> IPMB 1401 (MIC 25, 50, 50, 50, 25, 25, and 25 µg/mL, respectively)                              | [25] |
| 60  | litophynin A                 | eunicellane diterpene | <i>Litophyton</i> sp. | Sukumo Bay, Kochi Prefecture, Japan          | insect growth inhibitory against the silkworm <i>Bombyx mori</i> L. (ED <sub>50</sub> 12 ppm)                                                                                                                                                                                                                                                      | [49] |
| 61  | litophynin B                 | eunicellane diterpene | <i>Litophyton</i> sp. | Sukumo Bay, Kochi Prefecture, Japan          | insect growth inhibitory against the silkworm <i>B. mori</i> L. (ED <sub>50</sub> 2.7 ppm)                                                                                                                                                                                                                                                         | [49] |
| 62  | litophynin C                 | eunicellane diterpene | <i>Litophyton</i> sp. | Sukumo Bay, Kochi Prefecture, Japan          | insect growth inhibitory against the second instar larvae of the silkworm <i>B. mori</i> L. (ED <sub>50</sub> 25 ppm)                                                                                                                                                                                                                              | [50] |
|     |                              |                       | <i>Nephthea</i> sp.   | Sharm El-Sheikh, Egypt (Red Sea)             | potential SARS-CoV-2 main protease inhibitor <i>in silica</i>                                                                                                                                                                                                                                                                                      | [45] |
| 63  | litophynin D                 | eunicellane diterpene | <i>Litophyton</i> sp. | Sukumo Bay, Kochi Prefecture, Japan          | significant brine shrimp lethality (LD <sub>50</sub> 0.9 ppm)                                                                                                                                                                                                                                                                                      | [51] |
| 64  | litophynin E                 | eunicellane diterpene | <i>Litophyton</i> sp. | Sukumo Bay, Kochi Prefecture, Japan          | <sup>a</sup> –                                                                                                                                                                                                                                                                                                                                     | [51] |

| No. | Name                                       | Class                 | Species                     | Locality                              | Bioassays                                                                                                                                                                                                                                  | Ref. |
|-----|--------------------------------------------|-----------------------|-----------------------------|---------------------------------------|--------------------------------------------------------------------------------------------------------------------------------------------------------------------------------------------------------------------------------------------|------|
|     |                                            |                       | <i>Litophyton</i> sp.       | Nango-cho, Miyazaki Prefecture, Japan | <sup>b</sup> positive in a hemolytic reaction test                                                                                                                                                                                         | [54] |
| 65  | litophynin F                               | eunicellane diterpene | <i>Litophyton</i> sp.       | Sukumo Bay, Kochi Prefecture, Japan   | inactive against the second instar larvae of the silkworm <i>B. mori</i> L. at 100 ppm)                                                                                                                                                    | [52] |
|     |                                            |                       | <i>Litophyton viscidium</i> | Otsuki Town, Kochi Prefecture, Japan  | cytotoxic activity against the HL-60 cell line (IC <sub>50</sub> 18 µM)                                                                                                                                                                    | [18] |
| 66  | litophynin G                               | eunicellane diterpene | <i>Litophyton</i> sp.       | Sukumo Bay, Kochi Prefecture, Japan   | insect growth inhibitory against the second instar larvae of the silkworm <i>B. mori</i> L. (ED <sub>50</sub> 42 ppm)                                                                                                                      | [52] |
| 67  | litophynin H                               | eunicellane diterpene | <i>Litophyton</i> sp.       | Sukumo Bay, Kochi Prefecture, Japan   | inactive against the second instar larvae of the silkworm <i>B. mori</i> L. at 100 ppm                                                                                                                                                     | [52] |
|     |                                            |                       | <i>Litophyton</i> sp.       | Nango-cho, Miyazaki Prefecture, Japan | <sup>b</sup> positive in a hemolytic reaction test                                                                                                                                                                                         | [54] |
| 68  | litophynin I                               | eunicellane diterpene | <i>Litophyton</i> sp.       | Sukumo Bay, Kochi Prefecture, Japan   | significant molluscicidal activity against the muricid gastropod <i>Drupella fragum</i> with 100% mortality within 24 hours at 30 ppm, repellent activity against the gastropod when impregnated on filterpaper by 45 µg/cm <sup>2</sup> . | [53] |
| 69  | litophynin J                               | eunicellane diterpene | <i>Litophyton</i> sp.       | Sukumo Bay, Kochi Prefecture, Japan   | significant molluscicidal activity against the muricid gastropod <i>D. fragum</i> with 100% mortality within 24 hours at 30 ppm, repellent activity against the gastropod when impregnated on filterpaper by 45 µg/cm <sup>2</sup> .       | [53] |
| 70  | litophynol A                               | eunicellane diterpene | <i>Litophyton</i> sp.       | Nango-cho, Miyazaki Prefecture, Japan | <sup>b</sup> positive in a hemolytic reaction test                                                                                                                                                                                         | [54] |
| 71  | litophynol B                               | eunicellane diterpene | <i>Litophyton</i> sp.       | Nango-cho, Miyazaki Prefecture, Japan | <sup>b</sup> positive in a hemolytic reaction test                                                                                                                                                                                         | [54] |
| 72  | litophynin I monoacetate                   | eunicellane diterpene | <i>Litophyton</i> sp.       | Nango-cho, Miyazaki Prefecture, Japan | <sup>b</sup> positive in a hemolytic reaction test                                                                                                                                                                                         | [54] |
| 73  | <sup>c</sup> 6-oxo litophynin H            | eunicellane diterpene | <i>L. viscidium</i>         | Otsuki Town, Kochi Prefecture, Japan  | cytotoxic activity against the HL-60 cell line (IC <sub>50</sub> 20 µM)                                                                                                                                                                    | [18] |
| 74  | <sup>c</sup> 6-oxo litophynin H 12-acetate | eunicellane diterpene | <i>L. viscidium</i>         | Otsuki Town, Kochi Prefecture, Japan  | cytotoxic activity against the HL-60 cell line (IC <sub>50</sub> 20 µM)                                                                                                                                                                    | [18] |

| No. | Name                                    | Class                              | Species                   | Locality                             | Bioassays                                                                                                                       | Ref. |
|-----|-----------------------------------------|------------------------------------|---------------------------|--------------------------------------|---------------------------------------------------------------------------------------------------------------------------------|------|
| 75  | <sup>c</sup> 6-oxo litophynol A         | eunicellane diterpene              | <i>L. viscidium</i>       | Otsuki Town, Kochi Prefecture, Japan | cytotoxic activity against the HL-60 cell line (IC <sub>50</sub> 5.7 μM)                                                        | [18] |
| 76  | <sup>c</sup> 6- <i>epi</i> litophynol A | eunicellane diterpene              | <i>L. viscidium</i>       | Otsuki Town, Kochi Prefecture, Japan | cytotoxic activity against the HL-60 cell line (IC <sub>50</sub> 4.2 μM)                                                        | [18] |
| 77  | <sup>c</sup> 6-methyl litophynin E      | eunicellane diterpene              | <i>L. viscidium</i>       | Otsuki Town, Kochi Prefecture, Japan | cytotoxic activity against the HL-60 cell line (IC <sub>50</sub> 50 μM)                                                         | [18] |
| 78  | lemnabourside                           | serrulatane diterpene              | <i>L. setoensis</i>       | Singaraja, Bali Island, Indonesia    | weak cytotoxic activities against the HT-29, Capan-1, A549, and SNU-398 cell lines (all IC <sub>50</sub> >20 μM)                | [17] |
| 79  | biflora-4,9,15-triene                   | serrulatane diterpene              | <i>L. setoensis</i>       | Singaraja, Bali Island, Indonesia    | weak cytotoxic activities against the HT-29, Capan-1, A549, and SNU-398 cell lines (all IC <sub>50</sub> >20 μM)                | [17] |
| 80  | litosetoenin A                          | 5,9-cyclized serrulatane diterpene | <i>L. setoensis</i>       | Singaraja, Bali Island, Indonesia    | weak cytotoxic activities against the HT-29, Capan-1, A549, and SNU-398 cell lines (all IC <sub>50</sub> >20 μM)                | [17] |
| 81  | litosetoenin B                          | 5,9-cyclized serrulatane diterpene | <i>L. setoensis</i>       | Singaraja, Bali Island, Indonesia    | weak cytotoxic activities against the HT-29, Capan-1, A549, and SNU-398 cell lines (all IC <sub>50</sub> >20 μM)                | [17] |
| 82  | litosetoenin C                          | 5,9-cyclized serrulatane diterpene | <i>L. setoensis</i>       | Singaraja, Bali Island, Indonesia    | weak cytotoxic activities against the HT-29, Capan-1, A549, and SNU-398 cell lines (all IC <sub>50</sub> >20 μM)                | [17] |
| 83  | litosetoenin D                          | 5,9-cyclized serrulatane diterpene | <i>L. setoensis</i>       | Singaraja, Bali Island, Indonesia    | weak cytotoxic activities against the HT-29, Capan-1, A549, and SNU-398 cell lines (all IC <sub>50</sub> >20 μM)                | [17] |
| 84  | litosetoenin E                          | 5,9-cyclized serrulatane diterpene | <i>L. setoensis</i>       | Singaraja, Bali Island, Indonesia    | weak cytotoxic activities against the HT-29, Capan-1, A549, and SNU-398 cell lines (all IC <sub>50</sub> >20 μM)                | [17] |
| 85  | chabrolin A                             | chabrolane diterpene               | <i>Nephthea chabrolii</i> | Green Islang, Taitong County, Taiwan | cytotoxicity against the P-388 cell line (ED <sub>50</sub> 3.18 μg/mL), inactive against the A549 and HT-29 cell lines and HCMV | [56] |
| 86  | pacificin H                             | prenylbicyclogermacrane diterpene  | <i>Nephthea</i> sp.       | Sharm El-Sheikh, Egypt (Red Sea)     | potential SARS-CoV-2 main protease inhibitor <i>in silico</i>                                                                   | [45] |
| 87  | chabrolene                              | norditerpene                       | <i>Nephthea</i> sp.       | Mantanani Island,                    | repellent activity against the maize weevil <i>S. zeamais</i> at 25                                                             | [46] |

| No. | Name                                                                                                         | Class                          | Species                  | Locality                            | Bioassays                                                                                                                                                                                                                                         | Ref. |
|-----|--------------------------------------------------------------------------------------------------------------|--------------------------------|--------------------------|-------------------------------------|---------------------------------------------------------------------------------------------------------------------------------------------------------------------------------------------------------------------------------------------------|------|
|     |                                                                                                              |                                |                          | Sabah, Malaysia                     | $\mu\text{g}/\text{cm}^2$                                                                                                                                                                                                                         |      |
| 88  | all- <i>trans</i> -peridinin                                                                                 | tetraterpene                   | <i>L. arboreum</i>       | Hurghada, Egypt<br>(Red Sea)        | antiproliferative activities against the HUVEC and K-562 cell lines ( $\text{GI}_{50}$ $48.4 \pm 1.2$ and $53.8 \pm 3.9$ $\mu\text{M}$ , respectively), cytotoxicity against the HeLa cell line ( $\text{IC}_{50}$ $51.9 \pm 0.7$ $\mu\text{M}$ ) | [47] |
| 89  | O-methylisogrifolin                                                                                          | meroterpene                    | <i>Nephthea</i> sp.      | Sharm El-Sheikh, Egypt<br>(Red Sea) | potential SARS-CoV-2 main protease inhibitor <i>in silico</i>                                                                                                                                                                                     | [45] |
| 90  | chabrolbenzoquinone E                                                                                        | meroterpene                    | <i>Nephthea</i> sp.      | Sharm El-Sheikh, Egypt<br>(Red Sea) | potential SARS-CoV-2 main protease inhibitor <i>in silico</i>                                                                                                                                                                                     | [45] |
| 91  | chabrolhydroxybenzoquinone E                                                                                 | meroterpene                    | <i>Nephthea</i> sp.      | Sharm El-Sheikh, Egypt<br>(Red Sea) | potential SARS-CoV-2 main protease inhibitor <i>in silico</i>                                                                                                                                                                                     | [45] |
| 92  | chabrolonaphthoquinone A                                                                                     | meroterpene                    | <i>Nephthea</i> sp.      | Sharm El-Sheikh, Egypt<br>(Red Sea) | potential SARS-CoV-2 main protease inhibitor <i>in silico</i>                                                                                                                                                                                     | [45] |
| 93  | nephthoside monoacetate                                                                                      | meroterpene                    | <i>Nephthea</i> sp.      | Sharm El-Sheikh, Egypt<br>(Red Sea) | potential SARS-CoV-2 main protease inhibitor <i>in silico</i>                                                                                                                                                                                     | [45] |
| 94  | 4 $\alpha$ -methyl-3 $\beta$ ,8 $\beta$ -dihydroxy-5 $\alpha$ -ergost-24(28)-en-23-one                       | 4 $\alpha$ -methylated steroid | <i>L. viridis</i>        | Lesser Sunda Islands, Indonesia     | a –                                                                                                                                                                                                                                               | [58] |
|     |                                                                                                              |                                | <i>Nephthea</i> sp.      | Hurghada, Egypt<br>(Red Sea)        | cytotoxicity against the MCF-7 cell line ( $\text{IC}_{50}$ 124.3 $\mu\text{g}/\text{mL}$ )                                                                                                                                                       | [42] |
|     |                                                                                                              |                                | <i>Nephthea</i> sp.      | Mantanani Island, Sabah, Malaysia   | no repellent activity against the maize weevil <i>S. zeamais</i> at 250 $\mu\text{g}/\text{cm}^2$                                                                                                                                                 | [46] |
| 95  | 4 $\alpha$ ,24-dimethyl-5 $\alpha$ -cholest-24(28)-en-3 $\beta$ ,8 $\beta$ ,18-triol                         | 4 $\alpha$ -methylated steroid | <i>Litophyton mollis</i> | Hurghada, Egypt<br>(Red Sea)        | cytotoxic activities against the K562 and A549 cell lines ( $\text{IC}_{50}$ $8.9 \pm 0.9$ and $25.7 \pm 1.5$ $\mu\text{M}$ , respectively)                                                                                                       | [59] |
| 96  | (22 <i>E</i> ,24 <i>R</i> )-4 $\alpha$ ,24-dimethyl-5 $\alpha$ -cholest-22-en-3 $\beta$ ,8 $\beta$ ,18-triol | 4 $\alpha$ -methylated steroid | <i>L. mollis</i>         | Hurghada, Egypt<br>(Red Sea)        | inactive against the K562 and A549 cell lines (both $\text{IC}_{50}$ >50 $\mu\text{M}$ )                                                                                                                                                          | [59] |
|     |                                                                                                              |                                | <i>Nephthea</i> sp.      | Hurghada, Egypt<br>(Red Sea)        | cytotoxicity against the MCF-7 cell line ( $\text{IC}_{50}$ 113.6 $\mu\text{g}/\text{mL}$ )                                                                                                                                                       | [42] |
| 97  | (22 <i>E</i> )-4 $\alpha$ ,24-dimethyl-5 $\alpha$ -cholesta-2,24(28)-dien-3 $\beta$ ,8 $\beta$ ,18-triol     | 4 $\alpha$ -methylated steroid | <i>L. mollis</i>         | Hurghada, Egypt<br>(Red Sea)        | inactive against the K562 and A549 cell lines (both $\text{IC}_{50}$ >50 $\mu\text{M}$ )                                                                                                                                                          | [59] |
| 98  | nebrosteroid M                                                                                               | 4 $\alpha$ -methylated         | <i>L. mollis</i>         | Hurghada, Egypt                     | cytotoxic activity against the A549 cell line ( $\text{IC}_{50}$ $20.4 \pm 1.1$ )                                                                                                                                                                 | [59] |

| No. | Name                                                                                                            | Class                          | Species             | Locality                     | Bioassays                                                                                                                                                                                                                                | Ref. |
|-----|-----------------------------------------------------------------------------------------------------------------|--------------------------------|---------------------|------------------------------|------------------------------------------------------------------------------------------------------------------------------------------------------------------------------------------------------------------------------------------|------|
|     |                                                                                                                 | steroid                        |                     | (Red Sea)                    | $\mu\text{M}$ ), inactive against the K562 cell line ( $\text{IC}_{50} > 50 \mu\text{M}$ )                                                                                                                                               |      |
|     |                                                                                                                 |                                | <i>L. arboreum</i>  | Hurghada, Egypt<br>(Red Sea) | cytotoxic activity against the A549 and MCF-7 cell lines ( $\text{IC}_{50} 36.9 \pm 2.9$ and $55.3 \pm 4.9 \mu\text{mol/mL}$ , respectively), inactive against the HepG2 cell line ( $\text{IC}_{50} > 100 \mu\text{mol/mL}$ )           | [41] |
|     |                                                                                                                 |                                | <i>L. arboreum</i>  | Neweba, Egypt<br>(Red Sea)   | no anti-malarial activity against chloroquine-sensitive <i>P. falciparum</i> D6 and chloroquine-resistant <i>P. falciparum</i> W2 at the concentration of 4.76 mg/mL, non-toxic to the Vero cell line at the concentration of 4.76 mg/mL | [19] |
| 99  | (22E,24R)-4 $\alpha$ ,24-dimethyl-5 $\alpha$ -cholest-22-en-3 $\beta$ ,8 $\beta$ ,11 $\beta$ -triol             | 4 $\alpha$ -methylated steroid | <i>L. mollis</i>    | Hurghada, Egypt<br>(Red Sea) | cytotoxic activities against the K562 and A549 cell lines ( $\text{IC}_{50} 7.7 \pm 0.8$ and $20.8 \pm 1.2 \mu\text{M}$ , respectively)                                                                                                  | [59] |
|     |                                                                                                                 |                                | <i>L. arboreum</i>  | Neweba, Egypt<br>(Red Sea)   | no anti-malarial activity against chloroquine-sensitive <i>P. falciparum</i> D6 and chloroquine-resistant <i>P. falciparum</i> W2 at the concentration of 4.76 mg/mL, non-toxic to the Vero cell line at the concentration of 4.76 mg/mL | [19] |
| 100 | nebrosteroid D                                                                                                  | 4 $\alpha$ -methylated steroid | <i>L. mollis</i>    | Hurghada, Egypt<br>(Red Sea) | cytotoxic activities against the K562 and A549 cell lines ( $\text{IC}_{50} 6.0 \pm 0.5$ and $22.1 \pm 1.4 \mu\text{M}$ , respectively)                                                                                                  | [59] |
| 101 | nebrosteroid A                                                                                                  | 4 $\alpha$ -methylated steroid | <i>L. mollis</i>    | Hurghada, Egypt<br>(Red Sea) | cytotoxic activity against the K562 cell line ( $\text{IC}_{50} 5.8 \pm 0.8 \mu\text{M}$ )                                                                                                                                               | [59] |
| 102 | 23 $\xi$ -acetoxy-4 $\alpha$ ,24-dimethyl-5 $\alpha$ -cholest-24(28)-en-3 $\beta$ ,8 $\beta$ ,11 $\beta$ -triol | 4 $\alpha$ -methylated steroid | <i>L. mollis</i>    | Hurghada, Egypt<br>(Red Sea) | cytotoxic activity against the K562 cell line ( $\text{IC}_{50} 5.6 \pm 1.2 \mu\text{M}$ )                                                                                                                                               | [59] |
| 103 | (22E,24R)-4 $\alpha$ ,23,24-trimethyl-5 $\alpha$ -cholest-22-en-3 $\beta$ ,8 $\beta$ ,11 $\beta$ -triol         | 4 $\alpha$ -methylated steroid | <i>L. mollis</i>    | Hurghada, Egypt<br>(Red Sea) | inactive against the K562 and A549 cell lines (both $\text{IC}_{50} > 50 \mu\text{M}$ )                                                                                                                                                  | [59] |
|     |                                                                                                                 |                                | <i>L. arboreum</i>  | Neweba, Egypt<br>(Red Sea)   | no anti-malarial activity against chloroquine-sensitive <i>P. falciparum</i> D6 and chloroquine-resistant <i>P. falciparum</i> W2 at the concentration of 4.76 mg/mL, non-toxic to the Vero cell line at the concentration of 4.76 mg/mL | [19] |
| 104 | (22Z)-4 $\alpha$ ,24 $\xi$ -dimethyl-5 $\alpha$ -cholest-22-en-3 $\beta$ ,8 $\beta$ ,11 $\beta$ -triol          | 4 $\alpha$ -methylated steroid | <i>L. mollis</i>    | Hurghada, Egypt<br>(Red Sea) | a —                                                                                                                                                                                                                                      | [59] |
| 105 | 4 $\alpha$ ,24R-dimethyl-5 $\alpha$ -cholest-22-en-3 $\beta$ -ol                                                | 4 $\alpha$ -methylated steroid | <i>Nephthea</i> sp. | Hurghada, Egypt<br>(Red Sea) | cytotoxicity against the MCF-7 cell line ( $\text{IC}_{50} 201.7 \mu\text{g/mL}$ )                                                                                                                                                       | [42] |

| No. | Name                                                              | Class                              | Species              | Locality                                       | Bioassays                                                                                                                                                                                                                                                     | Ref. |
|-----|-------------------------------------------------------------------|------------------------------------|----------------------|------------------------------------------------|---------------------------------------------------------------------------------------------------------------------------------------------------------------------------------------------------------------------------------------------------------------|------|
| 106 | 4 $\alpha$ ,24-dimethyl-cholest-22Z-en-3 $\beta$ -ol              | 4 $\alpha$ -methylated steroid     | <i>L. arboreum</i>   | Hurghada, Egypt (Red Sea)                      | a —                                                                                                                                                                                                                                                           | [64] |
| 107 | 4 $\alpha$ -methylergosta-22(E),24(28)-dien-3 $\beta$ -ol         | 4 $\alpha$ -methylated steroid     | <i>N. columnaris</i> | Southern Taiwan                                | a —                                                                                                                                                                                                                                                           | [65] |
| 108 | 4 $\alpha$ -methyl-ergosta-6,8(14),22E-triene-3 $\beta$ -ol       | 4 $\alpha$ -methylated steroid     | <i>Nephtea</i> sp.   | Sharm El-Sheikh, Egypt (Red Sea)               | potential SARS-CoV-2 main protease inhibitor <i>in silico</i>                                                                                                                                                                                                 | [45] |
| 109 | 24-methylenecholest-5-en-3 $\beta$ ,7 $\beta$ ,19-triol           | ergostane-type and related steroid | <i>L. viridis</i>    | Serwaru, Leti Island, Indonesia                | a —                                                                                                                                                                                                                                                           | [57] |
|     |                                                                   |                                    | <i>L. arboreum</i>   | Xisha Islands, Hainan, China (South China Sea) | a —                                                                                                                                                                                                                                                           | [68] |
|     |                                                                   |                                    | <i>L. arboreum</i>   | Sharm El-Sheikh, Egypt (Red Sea)               | cytotoxic activities against the HeLa, Vero and U937 cell lines (IC <sub>50</sub> 8 $\pm$ 0.5, 11.4 $\pm$ 0.04 and 16.4 $\pm$ 1.25 $\mu$ M, respectively)                                                                                                     | [38] |
|     |                                                                   |                                    | <i>L. arboreum</i>   | Hurghada, Egypt (Red Sea)                      | a —                                                                                                                                                                                                                                                           | [64] |
|     |                                                                   |                                    | <i>L. arboreum</i>   | Sharm El-Sheikh, Egypt (Red Sea)               | cytotoxic effects against the HepG2, MDA and A549 cancer cell lines (IC <sub>50</sub> 8.5, 5.5 and 9.3 $\mu$ g/mL, respectively)                                                                                                                              | [39] |
|     |                                                                   |                                    | <i>L. arboreum</i>   | Jeddah, Saudi Arabia (Red Sea)                 | a —                                                                                                                                                                                                                                                           | [20] |
|     |                                                                   |                                    | <i>Nephtea</i> sp.   | Hurghada, Egypt (Red Sea)                      | cytotoxicity against the MCF-7 cell line (IC <sub>50</sub> 56.6 $\mu$ g/mL)                                                                                                                                                                                   | [42] |
| 110 | 7-acetoxy-24-methylenecholest-5-en-3 $\beta$ ,7 $\beta$ ,19-triol | ergostane-type and related steroid | <i>L. viridis</i>    | Serwaru, Leti Island, Indonesia                | a —                                                                                                                                                                                                                                                           | [57] |
|     |                                                                   |                                    | <i>L. arboreum</i>   | Sharm El-Sheikh, Egypt (Red Sea)               | inhibitory activity against HIV-1 protease receptor (IC <sub>50</sub> 4.85 $\pm$ 0.18 $\mu$ M), cytotoxic activities against the HeLa, Vero and U937 cell lines (IC <sub>50</sub> 5.3 $\pm$ 0.60, 31.3 $\pm$ 14.03 and 10.6 $\pm$ 0.12 $\mu$ M, respectively) | [38] |
|     |                                                                   |                                    | <i>L. arboreum</i>   | Sharm El-Sheikh, Egypt (Red Sea)               | cytotoxic effects against the HepG2, MDA and A549 cancer cell lines (IC <sub>50</sub> 6.07, 6.3 and 6.2 $\mu$ g/mL, respectively)                                                                                                                             | [39] |
|     |                                                                   |                                    | <i>L. arboreum</i>   | Neweba, Egypt                                  | a —                                                                                                                                                                                                                                                           | [19] |

| No. | Name                                                      | Class                                 | Species              | Locality                                             | Bioassays                                                                                                                                                                        | Ref. |
|-----|-----------------------------------------------------------|---------------------------------------|----------------------|------------------------------------------------------|----------------------------------------------------------------------------------------------------------------------------------------------------------------------------------|------|
|     |                                                           |                                       |                      | (Red Sea)                                            |                                                                                                                                                                                  |      |
|     |                                                           |                                       | <i>L. arboreum</i>   | Jeddah, Saudi Arabia<br>(Red Sea)                    | <sup>b</sup> antiproliferative effects toward MCF-7, HCT116 and HepG2 cell lines                                                                                                 | [43] |
|     |                                                           |                                       | <i>Nephthea</i> sp.  | Hurghada, Egypt<br>(Red Sea)                         | cytotoxicity against the MCF-7 cell line (IC <sub>50</sub> 37.0 µg/mL)                                                                                                           | [42] |
| 111 | litosterol                                                | ergostane-type<br>and related steroid | <i>L. viridis</i>    | Ishiqaki Island,<br>Okinawa, Japan                   | <sup>a</sup> —                                                                                                                                                                   | [67] |
|     |                                                           |                                       | <i>L. arboreum</i>   | Hurghada, Egypt<br>(Red Sea)                         | <sup>a</sup> —                                                                                                                                                                   | [64] |
|     |                                                           |                                       | <i>L. arboreum</i>   | Neweba, Egypt<br>(Red Sea)                           | <sup>a</sup> —                                                                                                                                                                   | [19] |
|     |                                                           |                                       | <i>N. columnaris</i> | Southern Taiwan                                      | no inhibitory effects on the generation of superoxide anions and the release of elastase (IC <sub>50</sub> >10 µM)                                                               | [74] |
| 112 | 5,6-epoxylitosterol                                       | ergostane-type<br>and related steroid | <i>L. viridis</i>    | Ishiqaki Island,<br>Okinawa, Japan                   | antileukemic activity against the P388 cell line (IC <sub>50</sub> 0.5 µg/mL)                                                                                                    | [67] |
|     |                                                           |                                       | <i>N. columnaris</i> | Southern Taiwan                                      | inhibitory effects on the generation of superoxide anions and the release of elastase (IC <sub>50</sub> 4.60±0.85 and 3.90±0.88 µM, respectively)                                | [74] |
| 113 | (24E)-24-ethyl-5α-cholesta-8,24(28)-diene-3β,12β,19-triol | ergostane-type<br>and related steroid | <i>L. arboreum</i>   | Xisha Islands, Hainan,<br>China<br>(South China Sea) | <sup>a</sup> —                                                                                                                                                                   | [68] |
| 114 | 24-methylcholesta-5,24(28)-diene-3β-ol                    | ergostane-type<br>and related steroid | <i>L. arboreum</i>   | Sharm El-Sheikh, Egypt<br>(Red Sea)                  | cytotoxic activities against the HeLa and Vero cell lines (IC <sub>50</sub> 48±8.7 and 100±1.2 µM, respectively), inactive against the U937 cell line (IC <sub>50</sub> >100 µM) | [38] |
|     |                                                           |                                       | <i>L. arboreum</i>   | Hurghada, Egypt<br>(Red Sea)                         | <sup>a</sup> —                                                                                                                                                                   | [64] |
|     |                                                           |                                       | <i>L. arboreum</i>   | Jeddah, Saudi Arabia<br>(Red Sea)                    | <sup>a</sup> —                                                                                                                                                                   | [20] |
|     |                                                           |                                       | <i>L. arboreum</i>   | Hurghada, Egypt<br>(Red Sea)                         | cytotoxic activities against the A549, MCF-7 and HepG2 cell lines (IC <sub>50</sub> 28.5±4.4, 70.0±2.3 and 77.6±3.3 µmol/mL,                                                     | [41] |

| No. | Name                                                          | Class                              | Species               | Locality                              | Bioassays                                                                                                                                                                                                                   | Ref. |
|-----|---------------------------------------------------------------|------------------------------------|-----------------------|---------------------------------------|-----------------------------------------------------------------------------------------------------------------------------------------------------------------------------------------------------------------------------|------|
|     |                                                               |                                    |                       |                                       | respectively)                                                                                                                                                                                                               |      |
|     |                                                               |                                    | <i>Nephthea</i> sp.   | Hurghada, Egypt<br>(Red Sea)          | cytotoxicity against the MCF-7 cell line (IC <sub>50</sub> 339.2 µg/mL)                                                                                                                                                     | [42] |
|     |                                                               |                                    | <i>N. erecta</i>      | Pingtung, Taiwan                      | inactive against the K-562, MOLT-4, SUP-T1, and U-937 cell lines (all IC <sub>50</sub> >20 µM)                                                                                                                              | [75] |
| 115 | 3β,7β-dihydroxy-24-methylenecholesterol                       | ergostane-type and related steroid | <i>L. arboreum</i>    | Neweba, Egypt<br>(Red Sea)            | anti-malarial activity against chloroquine-resistant <i>P. falciparum</i> W2 (IC <sub>50</sub> 4.0 mg/mL), no anti-malarial effect against chloroquine-sensitive <i>P. falciparum</i> D6 at the concentration of 4.76 mg/mL | [19] |
| 116 | chabrolsteroid I                                              | ergostane-type and related steroid | <i>L. arboreum</i>    | Neweba, Egypt<br>(Red Sea)            | no anti-malarial effect against chloroquine-resistant <i>P. falciparum</i> W2 and chloroquine-sensitive <i>P. falciparum</i> D6 at the concentration of 4.76 mg/mL                                                          | [19] |
| 117 | 13,14-seco-22-norergosta-4,24(28)-dien-19-hydroperoxide-3-one | ergostane-type and related steroid | <i>L. arboreum</i>    | Jeddah, Saudi Arabia<br>(Red Sea)     | <sup>b</sup> antiproliferative effects toward MCF-7, HCT116 and HepG2 cell lines                                                                                                                                            | [43] |
| 118 | sarcsteroid F                                                 | ergostane-type and related steroid | <i>Litophyton</i> sp. | Egyptian Red Sea                      | <sup>a</sup> —                                                                                                                                                                                                              | [27] |
| 119 | 24-methylenecholestane-1α,3β,5α,6β,11α-pentol-11-monoacetate  | ergostane-type and related steroid | <i>Litophyton</i> sp. | Egyptian Red Sea                      | <sup>a</sup> —                                                                                                                                                                                                              | [27] |
| 120 | nebrosteroid O                                                | ergostane-type and related steroid | <i>N. chabrolii</i>   | San-Hsian-Tai, Taitong County, Taiwan | cytotoxic activities against the A549, HT-29 and P-388 cell lines (ED <sub>50</sub> 5.9, 5.9 and 1.2 µg/mL, respectively); inactive against HCMV (ED <sub>50</sub> >100 µg/mL)                                              | [69] |
|     |                                                               |                                    | <i>Nephthea</i> sp.   | Sharm El-Sheikh, Egypt<br>(Red Sea)   | potential SARS-CoV-2 main protease inhibitor <i>in silico</i>                                                                                                                                                               | [45] |
| 121 | nebrosteroid P                                                | ergostane-type and related steroid | <i>N. chabrolii</i>   | San-Hsian-Tai, Taitong County, Taiwan | cytotoxic activities against the A549, HT-29 and P-388 cell lines (ED <sub>50</sub> 7.2, 9.5 and 1.7 µg/mL, respectively); inactive against HCMV (ED <sub>50</sub> >100 µg/mL)                                              | [69] |
| 122 | nebrosteroid Q                                                | ergostane-type and related steroid | <i>N. chabrolii</i>   | San-Hsian-Tai, Taitong County, Taiwan | cytotoxic activities against the A549, HT-29 and P-388 cell lines (ED <sub>50</sub> 6.1, 8.0 and 1.1 µg/mL, respectively); inactive against HCMV (ED <sub>50</sub> >100 µg/mL)                                              | [70] |
| 123 | nebrosteroid R                                                | ergostane-type                     | <i>N. chabrolii</i>   | San-Hsian-Tai, Taitong                | cytotoxic activities against the A549, HT-29 and P-388 cell                                                                                                                                                                 | [70] |



| No. | Name                                                         | Class                              | Species              | Locality                              | Bioassays                                                                                                                                                                          | Ref. |
|-----|--------------------------------------------------------------|------------------------------------|----------------------|---------------------------------------|------------------------------------------------------------------------------------------------------------------------------------------------------------------------------------|------|
|     |                                                              | and related steroid                |                      | County, Taiwan                        | lines (ED <sub>50</sub> 11.4, 20.9 and 1.2 µg/mL, respectively); inactive against HCMV (ED <sub>50</sub> >100 µg/mL)                                                               |      |
| 124 | nebrosteroid S                                               | ergostane-type and related steroid | <i>N. chabrolii</i>  | San-Hsian-Tai, Taitong County, Taiwan | cytotoxic activities against the A549, HT-29 and P-388 cell lines (ED <sub>50</sub> 8.7, 15.3 and 1.0 µg/mL, respectively); inactive against HCMV (ED <sub>50</sub> >100 µg/mL)    | [70] |
| 125 | nephasterol A                                                | ergostane-type and related steroid | <i>N. columnaris</i> | Southern Taiwan                       | cytotoxicities against the MOLT-4, SUP-T1, U-937, DLD-1, LNCaP, and MCF7 cell lines (IC <sub>50</sub> 22.5, 32.4, 38.6, 44.2, 11.6, and 9.8 µM, respectively)                      | [48] |
| 126 | columnaristerol A                                            | ergostane-type and related steroid | <i>N. columnaris</i> | Southern Taiwan                       | moderate cytotoxic effects against the MOLT-4 and SUP-T1 cell lines (IC <sub>50</sub> 18.3 and 25.5 µM, respectively), inactive against the K-562 and U-937 cell lines at 20 µg/mL | [73] |
| 127 | columnaristerol B                                            | ergostane-type and related steroid | <i>N. columnaris</i> | Southern Taiwan                       | no inhibitory effects on the generation of superoxide anions and the release of elastase (IC <sub>50</sub> >10 µM)                                                                 | [74] |
| 128 | columnaristerol C                                            | ergostane-type and related steroid | <i>N. columnaris</i> | Southern Taiwan                       | no inhibitory effects on the generation of superoxide anions and the release of elastase (IC <sub>50</sub> >10 µM)                                                                 | [74] |
| 129 | nephtheasteroid A                                            | ergostane-type and related steroid | <i>N. erecta</i>     | Pingtung, Taiwan                      | inactive against the K-562, MOLT-4, SUP-T1, and U-937 cell lines (all IC <sub>50</sub> >20 µM)                                                                                     | [75] |
| 130 | nephtheasteroid B                                            | ergostane-type and related steroid | <i>N. erecta</i>     | Pingtung, Taiwan                      | inactive against the K-562, MOLT-4, SUP-T1, and U-937 cell lines (IC <sub>50</sub> >20 µM)                                                                                         | [75] |
| 131 | erectasteroid F                                              | ergostane-type and related steroid | <i>N. erecta</i>     | Pingtung, Taiwan                      | cytotoxic activities against the K-562, MOLT-4, SUP-T1, and U-937 cell lines (IC <sub>50</sub> 6.5, 8.0, 8.0, and 12.9 µM, respectively)                                           | [75] |
| 132 | (3β,7β)-ergost-5,24(28)-diene-3β,7β, 19-triol-7,19-diacetate | ergostane-type and related steroid | <i>N. erecta</i>     | Pingtung, Taiwan                      | cytotoxic activities against the K-562, MOLT-4, SUP-T1, and U-937 cell lines (IC <sub>50</sub> 14.0, 7.9, 7.3, and 6.8 µM, respectively)                                           | [75] |
| 133 | 24-methyl-cholesta-5,24(28)-diene-3β,19-diol-7β-monoacetate  | ergostane-type and related steroid | <i>N. erecta</i>     | Pingtung, Taiwan                      | cytotoxic activities against the K-562, MOLT-4 and SUP-T1 cell lines (IC <sub>50</sub> 11.2, 19.9 and 16.3 µM), inactive against the U-937 cell line (IC <sub>50</sub> >20 µM)     | [75] |
|     |                                                              |                                    | <i>N. erecta</i>     | Pingtung, Taiwan                      | inhibited human small cell lung cancer growth via apoptosis induction                                                                                                              | [76] |

| No. | Name                                                    | Class                               | Species                    | Locality                              | Bioassays                                                                                                                                                                                        | Ref. |
|-----|---------------------------------------------------------|-------------------------------------|----------------------------|---------------------------------------|--------------------------------------------------------------------------------------------------------------------------------------------------------------------------------------------------|------|
| 134 | armatinol B                                             | ergostane-type and related steroid  | <i>N. erecta</i>           | Pingtung, Taiwan                      | inactive against the K-562, MOLT-4, SUP-T1, and U-937 cell lines (all IC <sub>50</sub> >20 µM)                                                                                                   | [75] |
| 135 | chabrolosteroid C                                       | ergostane-type and related steroid  | <i>Nephthea</i> sp.        | Sharm El-Sheikh, Egypt (Red Sea)      | potential SARS-CoV-2 main protease inhibitor <i>in silico</i>                                                                                                                                    | [45] |
| 136 | ergost-5,25-diene-3β,24S,28-triol                       | ergostane-type and related steroid  | <i>Nephthea</i> sp.        | Sharm El-Sheikh, Egypt (Red Sea)      | potential SARS-CoV-2 main protease inhibitor <i>in silico</i>                                                                                                                                    | [45] |
| 137 | nebrosteroid N                                          | cholestane-type and related steroid | <i>Nephthea chabroliei</i> | San-Hsian-Tai, Taitong County, Taiwan | cytotoxic activities against the A549, HT-29 and P-388 cell lines (ED <sub>50</sub> 6.7, 9.5 and 0.9 µg/mL, respectively); inactive against HCMV (ED <sub>50</sub> >100 µg/mL)                   | [69] |
| 138 | (20S,22R)-progesterone-1,4-diene-2-acetyl-3-one         | cholestane-type and related steroid | <i>Nephthea</i> sp.        | Naozhou Island, South China Sea       | <sup>b</sup> weak cytotoxic activities against A549 and Hepg2 cell lines                                                                                                                         | [77] |
| 139 | (12β,22R)-12-acetoxy-22-hydroxy-cholesta-1,4-dien-3-one | cholestane-type and related steroid | <i>Nephthea</i> sp.        | Naozhou Island, South China Sea       | cytotoxic activity against the HeLa cell line (IC <sub>50</sub> 7.51±0.22 µg/mL)                                                                                                                 | [78] |
| 140 | (12β,22R)-12-hydroxy-22-acetoxy-cholesta-1,4-dien-3-one | cholestane-type and related steroid | <i>Nephthea</i> sp.        | Naozhou Island, South China Sea       | cytotoxic activity against the HeLa cell line (IC <sub>50</sub> 7.50±0.31 µg/mL)                                                                                                                 | [78] |
| 141 | (12β,22R)-12,22-diacetoxy-cholesta-1,4-dien-3-one       | cholestane-type and related steroid | <i>Nephthea</i> sp.        | Naozhou Island, South China Sea       | cytotoxic activity against the HeLa cell line (IC <sub>50</sub> 18.48±0.56 µg/mL)                                                                                                                | [78] |
| 142 | (22R)-18,22-diacetoxy-cholesta-1,4-dien-3-one           | cholestane-type and related steroid | <i>Nephthea</i> sp.        | Naozhou Island, South China Sea       | cytotoxic activity against the HeLa cell line (IC <sub>50</sub> 8.29±0.42 µg/mL)                                                                                                                 | [78] |
| 143 | (20R,22R)-20-hydroxy-22-acetoxy-cholesta-1,4-dien-3-one | cholestane-type and related steroid | <i>Nephthea</i> sp.        | Naozhou Island, South China Sea       | cytotoxic activity against the HeLa cell line (IC <sub>50</sub> 17.25±0.61 µg/mL)                                                                                                                | [78] |
| 144 | astrogorgol N                                           | cholestane-type and related steroid | <i>Nephthea</i> sp.        | Naozhou Island, South China Sea       | cytotoxic activity against the HeLa cell line (IC <sub>50</sub> 18.72±0.78 µg/mL)                                                                                                                | [78] |
| 145 | nephthoacetal                                           | cholestane-type and related steroid | <i>Nephthea</i> sp.        | Naozhou Island, South China Sea       | strong antifouling activity against the settlement of <i>Bugula neritina</i> larvae (EC <sub>50</sub> 2.5 µg/mL), moderate cytotoxicity against the HeLa cell line (EC <sub>50</sub> 12.3 µg/mL) | [79] |
| 146 | dendronesterone C                                       | cholestane-type and related steroid | <i>Nephthea</i> sp.        | Sharm El-Sheikh, Egypt (Red Sea)      | potential SARS-CoV-2 main protease inhibitor <i>in silico</i>                                                                                                                                    | [45] |
| 147 | (17α)-pregnan-4-ene-3,20-dione                          | pregnane-type and related steroid   | <i>Nephthea</i> sp.        | Naozhou Island, South China Sea       | <sup>a</sup> –                                                                                                                                                                                   | [80] |

| No. | Name                                                                              | Class                             | Species             | Locality                         | Bioassays                                                                                                                                                                    | Ref. |
|-----|-----------------------------------------------------------------------------------|-----------------------------------|---------------------|----------------------------------|------------------------------------------------------------------------------------------------------------------------------------------------------------------------------|------|
| 148 | (20S)-pregnan-1,4-diene-3-oxo-20-carboxylic acid methyl ester                     | pregnane-type and related steroid | <i>Nephthea</i> sp. | Naozhou Island, South China Sea  | <sup>a</sup> —                                                                                                                                                               | [80] |
| 149 | pregnan-4-ene-3,6,20-trione                                                       | pregnane-type and related steroid | <i>Nephthea</i> sp. | Naozhou Island, South China Sea  | <sup>a</sup> —                                                                                                                                                               | [80] |
| 150 | (20R)-pregnan-4,16-dien-20-hydroxy-3-one                                          | pregnane-type and related steroid | <i>Nephthea</i> sp. | Naozhou Island, South China Sea  | <sup>a</sup> —                                                                                                                                                               | [80] |
| 151 | pregnan-15 $\beta$ -hydroxy-4,6-diene-3,20-dione                                  | pregnane-type and related steroid | <i>Nephthea</i> sp. | Naozhou Island, South China Sea  | <sup>a</sup> —                                                                                                                                                               | [80] |
| 152 | pregnan-4,6-diene-3,20-dione                                                      | pregnane-type and related steroid | <i>Nephthea</i> sp. | Naozhou Island, South China Sea  | <sup>a</sup> —                                                                                                                                                               | [80] |
| 153 | erythro- <i>N</i> -dodecanoyl-docosasphingina-(4 <i>E</i> ,8 <i>E</i> )-dienine   | ceramide                          | <i>L. arboreum</i>  | Sharm El-Sheikh, Egypt (Red Sea) | cytotoxic activity against the HeLa cell line (IC <sub>50</sub> 38.17 $\pm$ 0.7 $\mu$ M), inactive against the Vero and U937 cell lines (both IC <sub>50</sub> >100 $\mu$ M) | [38] |
|     |                                                                                   |                                   | <i>L. arboreum</i>  | Jeddah, Saudi Arabia (Red Sea)   | <sup>b</sup> antiproliferative effects toward MCF-7, HCT116 and HepG2 cell lines                                                                                             | [43] |
|     |                                                                                   |                                   | <i>L. arboreum</i>  | Jeddah, Saudi Arabia (Red Sea)   | <sup>a</sup> —                                                                                                                                                               | [40] |
|     |                                                                                   |                                   | <i>L. arboreum</i>  | Neweba, Egypt (Red Sea)          | <sup>a</sup> —                                                                                                                                                               | [19] |
|     |                                                                                   |                                   | <i>Nephthea</i> sp. | Hurghada, Egypt (Red Sea)        | cytotoxicity against the MCF-7 cell line (IC <sub>50</sub> 238.5 $\mu$ g/mL)                                                                                                 | [42] |
| 154 | erythro- <i>N</i> -palmityl-octadecasphingina-4( <i>E</i> ),8( <i>E</i> )-dienine | ceramide                          | <i>L. arboreum</i>  | Hurghada, Egypt (Red Sea)        | <sup>a</sup> —                                                                                                                                                               | [64] |
|     |                                                                                   |                                   | <i>Nephthea</i> sp. | Sharm El-Sheikh, Egypt (Red Sea) | potential SARS-CoV-2 main protease inhibitor <i>in silico</i>                                                                                                                | [45] |
| 155 | thymine                                                                           | pyrimidine                        | <i>L. arboreum</i>  | Jeddah, Saudi Arabia (Red Sea)   | <sup>a</sup> —                                                                                                                                                               | [40] |
|     |                                                                                   |                                   | <i>L. arboreum</i>  | Hurghada, Egypt (Red Sea)        | inactive against the A549, MCF-7 and HepG2 cell lines (all IC <sub>50</sub> >100 $\mu$ g/mL), inactive against <i>Leishmania major</i> (IC <sub>50</sub> >100 $\mu$ g/mL)    | [81] |

| No. | Name                                                                                                                             | Class             | Species               | Locality                                  | Bioassays                                                                                                                                                                                                                                                                                            | Ref. |
|-----|----------------------------------------------------------------------------------------------------------------------------------|-------------------|-----------------------|-------------------------------------------|------------------------------------------------------------------------------------------------------------------------------------------------------------------------------------------------------------------------------------------------------------------------------------------------------|------|
| 156 | thymidine                                                                                                                        | pyrimidine        | <i>L. arboreum</i>    | Jeddah, Saudi Arabia<br>(Red Sea)         | <sup>a</sup> –                                                                                                                                                                                                                                                                                       | [40] |
| 157 | uracil                                                                                                                           | pyrimidine        | <i>L. arboreum</i>    | Hurghada, Egypt<br>(Red Sea)              | inactive against the A549, MCF-7 and HepG2 cell lines (all IC <sub>50</sub> >100 µg/mL), inactive against against <i>L. major</i> (IC <sub>50</sub> >100 µg/mL)                                                                                                                                      | [81] |
| 158 | uridine                                                                                                                          | pyrimidine        | <i>L. arboreum</i>    | Hurghada, Egypt<br>(Red Sea)              | inactive against the A549, MCF-7 and HepG2 cell lines (all IC <sub>50</sub> >100 µg/mL), inactive against against <i>L. major</i> (IC <sub>50</sub> >100 µg/mL)                                                                                                                                      | [81] |
| 159 | 1,3-dimethyl uracil                                                                                                              | pyrimidine        | <i>Nephtea</i> sp.    | Naozhou Island, South<br>China Sea        | <sup>a</sup> –                                                                                                                                                                                                                                                                                       | [82] |
| 160 | caffeine                                                                                                                         | pyrimidine        | <i>Nephtea</i> sp.    | Naozhou Island, South<br>China Sea        | <sup>a</sup> –                                                                                                                                                                                                                                                                                       | [82] |
| 161 | theophylline                                                                                                                     | pyrimidine        | <i>Nephtea</i> sp.    | Naozhou Island, South<br>China Sea        | <sup>a</sup> –                                                                                                                                                                                                                                                                                       | [82] |
| 162 | cyclo-(Pro-Gly)                                                                                                                  | peptide           | <i>Nephtea</i> sp.    | Naozhou Island, South<br>China Sea        | <sup>a</sup> –                                                                                                                                                                                                                                                                                       | [82] |
| 163 | leucyl- <i>N</i> -methyl-leucyl-leucyl- <i>N</i> -methyl-leucine                                                                 | peptide           | <i>Nephtea</i> sp.    | Naozhou Island, South<br>China Sea        | <sup>b</sup> weak cytotoxic activities against A549 and Hepg2 cell lines                                                                                                                                                                                                                             | [77] |
| 164 | PGB <sub>2</sub> methyl ester                                                                                                    | prostaglandin     | <i>L. arboreum</i>    | gulf of Aqaba, Eilat,<br>Israel (Red Sea) | <sup>a</sup> –                                                                                                                                                                                                                                                                                       | [83] |
| 165 | litophytolide A                                                                                                                  | $\gamma$ -lactone | <i>Litophyton</i> sp. | Sukumo Bay, Kochi<br>Prefecture, Japan    | <sup>a</sup> –                                                                                                                                                                                                                                                                                       | [84] |
| 166 | litophytolide B                                                                                                                  | $\gamma$ -lactone | <i>Litophyton</i> sp. | Sukumo Bay, Kochi<br>Prefecture, Japan    | <sup>a</sup> –                                                                                                                                                                                                                                                                                       | [84] |
| 167 | <sup>c</sup><br>( <i>R</i> )-5-(( <i>S</i> ,2 <i>Z</i> ,4 <i>E</i> )-1-hydroxydeca-2,4-dien-1-yl)dihydrofuran-2(3 <i>H</i> )-one | $\gamma$ -lactone | <i>L. arboreum</i>    | gulf of Aqaba, Eilat,<br>Israel (Red Sea) | toxic to brine shrimp <i>Artemia salina</i> (CC <sub>50</sub> 15.3 µg/mL), antibacterial activities against <i>S. aureus</i> (diameters of inhibition zone 7.8 mm) and <i>B. subtilis</i> (diameters of inhibition zone 5.6 mm), inactive against <i>E. coli</i> and <i>Saccharomyces cerevisiae</i> | [83] |
| 168 | <sup>c</sup>                                                                                                                     | $\gamma$ -lactone | <i>L. arboreum</i>    | gulf of Aqaba, Eilat,                     | toxic to brine shrimp <i>A. salina</i> (CC <sub>50</sub> 21.4 µg/mL),                                                                                                                                                                                                                                | [83] |

| No. | Name                                                                                          | Class          | Species               | Locality                               | Bioassays                                                                                                                                                                                                                                                                  | Ref. |
|-----|-----------------------------------------------------------------------------------------------|----------------|-----------------------|----------------------------------------|----------------------------------------------------------------------------------------------------------------------------------------------------------------------------------------------------------------------------------------------------------------------------|------|
|     | (R)-5-((S,4E,8E)-1-hydroxy-4,8-dimethyltrideca-4,8-dien-1-yl)-5-methylidihydrofuran-2(3H)-one |                |                       | Israel (Red Sea)                       | antibacterial activities against <i>S. aureus</i> (diameters of inhibition zone 18.6 mm) and <i>B. subtilis</i> (diameters of inhibition zone 14.7 mm), inactive against <i>E. coli</i> and <i>S. cerevisiae</i>                                                           |      |
| 169 | methyl (5Z,8Z,11Z,14Z,17Z)-5,8,11,14,17-icosapentaenoate                                      | fatty acid     | <i>Litophyton</i> sp. | Sukumo Bay, Kochi Prefecture, Japan    | <sup>a</sup> –                                                                                                                                                                                                                                                             | [84] |
| 170 | arachidonic acid                                                                              | fatty acid     | <i>L. arboreum</i>    | gulf of Aqaba, Eilat, Israel (Red Sea) | <sup>a</sup> –                                                                                                                                                                                                                                                             | [83] |
| 171 | eicosapentaenoic acid                                                                         | fatty acid     | <i>L. arboreum</i>    | gulf of Aqaba, Eilat, Israel (Red Sea) | <sup>a</sup> –                                                                                                                                                                                                                                                             | [83] |
| 172 | docosahexaenoic acid                                                                          | fatty acid     | <i>L. arboreum</i>    | gulf of Aqaba, Eilat, Israel (Red Sea) | <sup>a</sup> –                                                                                                                                                                                                                                                             | [83] |
| 173 | chimyl alcohol                                                                                | glycerol ether | <i>L. arboreum</i>    | Sharm El-Sheikh, Egypt (Red Sea)       | cytotoxic activity against the HeLa and Vero cell lines (IC <sub>50</sub> 23.35±5.8 and 60±1.14 µM, respectively), inactive against the U937 cell line (both IC <sub>50</sub> >100 µM), inhibitory activity against HIV-1 protease receptor (IC <sub>50</sub> 26.6±2.6 µM) | [38] |
|     |                                                                                               |                | <i>L. arboreum</i>    | Hurghada, Egypt (Red Sea)              | inactive against the A549, MCF-7 and HepG2 cell lines (all IC <sub>50</sub> >100 µmol/mL)                                                                                                                                                                                  | [41] |
| 174 | batyl alcohol                                                                                 | glycerol ether | <i>L. arboreum</i>    | Hurghada, Egypt (Red Sea)              | inactive against the A549, MCF-7 and HepG2 cell lines (all IC <sub>50</sub> >100 µmol/mL)                                                                                                                                                                                  | [41] |
| 175 | diphenyl selenide                                                                             | selenide       | <i>Nephtea</i> sp.    | Naozhou Island, South China Sea        | <sup>a</sup> –                                                                                                                                                                                                                                                             | [82] |

<sup>a</sup> The sign '–' indicated no bioassay was recorded in the work.

<sup>b</sup> No specific data was provided in the paper.

<sup>c</sup> Compound was named based on its structure.
